# Supplementary material for: Mo-LDH-GO Hybrid Catalysts for Indigo Carmine Advanced Oxidation
Source: MDPI journal article supplement (doi:10.3390/ma16083025), 2023-04-11
Supplement: s1 [file s1]

# Mo-LDH-GO Hybrid Catalysts for Indigo Carmine Advanced Oxidation

Octavian Dumitru Pavel<sup>1,2</sup>, Alexandra-Elisabeta Stamate<sup>1,2</sup>, Rodica Zăvoianu<sup>1,2,\*</sup>, Anca Cruceanu<sup>1,2</sup>, Alina Tirsoaga<sup>2</sup>, Ruxandra Bîrjega<sup>3</sup>, Ioana Andreea Brezeştean<sup>4</sup>, Alexandra Ciorîţă<sup>4,5</sup>, Daniela Cristina Culiţă<sup>6</sup> and Ana Paula Vieira Soares Dias<sup>7</sup>

<sup>1</sup> University of Bucharest, Faculty of Chemistry, Department of Inorganic Chemistry, Organic Chemistry, Biochemistry and Catalysis, 4-12 Regina Elisabeta Bd., 030018 Bucharest, Romania

<sup>2</sup> Research Center for Catalysts & Catalytic Processes, Faculty of Chemistry, University of Bucharest, 4-12 Regina Elisabeta Bd., 030018 Bucharest, Romania

<sup>3</sup> National Institute for Lasers, Plasma and Radiation Physics, 409 Atomistilor Street, PO Box MG-16, 077125 Măgurele, Romania

<sup>4</sup> National Institute for Research and Development of Isotopic and Molecular Technologies, 67-103 Donat Street, 400293 Cluj-Napoca, Romania

<sup>5</sup> Electron Microscopy Centre, Faculty of Biology and Geology, Babes-Bolyai University, 44 Republicii Street, 400015 Cluj-Napoca, Romania

<sup>6</sup> Ilie Murgulescu Institute of Physical Chemistry, 202 Splaiul Independentei, 060021 Bucharest, Romania

<sup>7</sup> CERENA, Instituto Superior Técnico, Universidade de Lisboa, 1 Rovisco Pais Av., 1049-001 Lisboa, Portugal

\* Correspondence: rodica.zavoianu@chimie.unibuc.ro

## S1. The preparation of the GO suspension

The method applied for the preparation of graphene oxide is based on the technique developed by Hummers in 1952 [4, 24]. Thus, graphite powder (325 mesh, from Aldrich, Schnelldorf, Germany), sodium nitrate ( $\text{NaNO}_3$ ) and potassium permanganate ( $\text{KMnO}_4$ , chemical purity, from Merck, Darmstadt, Germany), sulfuric acid ( $\text{H}_2\text{SO}_4$ , 98%, from Merck, Darmstadt, Germany), hydrochloric acid ( $\text{HCl}$ , 37%, from Merck), and hydrogen peroxide ( $\text{H}_2\text{O}_2$ , 30%, from Chimreactiv, Bucharest, Romania) were utilized. In brief, 23 mL concentrated sulfuric acid and 1 g of graphite were mixed in an Erlenmeyer flask maintained in an ice bath at 0 °C. Then, 0.5 g of sodium nitrate and 3.0 g of potassium permanganate were slowly added to the formed solution which was kept under continuous stirring for 30 min. Further, the paste was diluted with 46 mL of distilled water causing a strong exothermic effect accompanied by bubbling, and the resulting mixture was stirred for one hour at 90 °C. Moreover, to remove the residual permanganate, the whole solution was mixed with 71 mL of warm distilled water and 5 mL  $\text{H}_2\text{O}_2$  and kept for one hour under stirring. For the removal of the remaining metal ions, 125 mL  $\text{HCl}$  0.1 N was added, and the solution was stirred for another hour. The resulting mixture was centrifuged and washed with warm distilled water until the conductivity was below 100  $\mu\text{S}/\text{cm}$ . The concentration of GO in the suspension was determined using the gravimetric method, by weighing 3 liquid samples of 100 mL in Petri dishes before and after the evaporation of water under vacuum at 60 °C for 24 h. The amount of solid recovered from the 3 samples was 0.4001, 0.4005, and 0.3998 g, which gave an average value of the GO concentration in the suspension of ca. 4 g/L.

**Table S1.** Compositions of the solutions A and B used in the syntheses of HTMo-xGO hybrids.

| Samples   | Solution A                         |                                    |                                                                      |                                                                      |           | Solution B                         |                  |                                                                     |
|-----------|------------------------------------|------------------------------------|----------------------------------------------------------------------|----------------------------------------------------------------------|-----------|------------------------------------|------------------|---------------------------------------------------------------------|
|           | Volume<br>H <sub>2</sub> O<br>(mL) | Volume<br>GO<br>suspension<br>(mL) | Mg(NO <sub>3</sub> ) <sub>2</sub> ·<br>6H <sub>2</sub> O<br>g/mMoles | Al(NO <sub>3</sub> ) <sub>3</sub> ·<br>9H <sub>2</sub> O<br>g/mMoles | GO<br>(g) | Volume<br>H <sub>2</sub> O<br>(mL) | NaOH<br>g/mMoles | Na <sub>2</sub> MoO <sub>4</sub> ·<br>2H <sub>2</sub> O<br>g/mMoles |
| HTMo      | 847                                | 0                                  | 22.72/88.6                                                           | 11.08/29.5                                                           | 0         | 845                                | 10.4/260         | 3.6/14.9                                                            |
| HTMo-5GO  | 679.5                              | 125                                | 21.59/84.2                                                           | 10.54/28.1                                                           | 0.5       | 817.6                              | 9.9/247.5        | 3.4/14.1                                                            |
| HTMo-10GO | 519                                | 250                                | 20.49/79.9                                                           | 10/26.7                                                              | 1         | 782                                | 9.4/235          | 3.24/13.4                                                           |
| HTMo-15GO | 308.5                              | 375                                | 19.29/75.3                                                           | 9.4/25.1                                                             | 1.5       | 695                                | 8.84/221         | 3.05/12.6                                                           |
| HTMo-20GO | 150.6                              | 500                                | 18/70.2                                                              | 8.79/23.4                                                            | 2         | 661.6                              | 8.24/206         | 2.84/11.7                                                           |
| HTMo-25GO | 25                                 | 625                                | 17/66.3                                                              | 8.3/22.1                                                             | 2.5       | 660                                | 7.8/195          | 2.7/11.2                                                            |

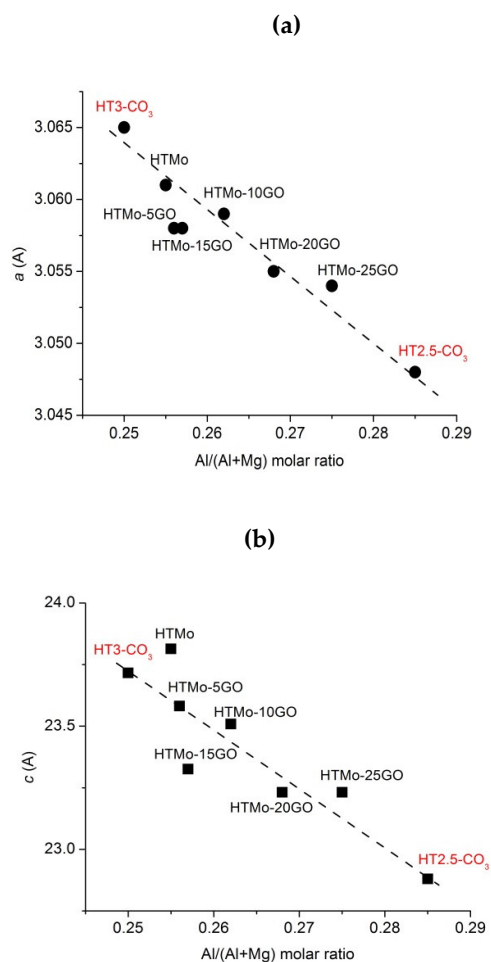

**Figure S1.** The linear variation of the lattice parameters determined by XRD depending on the 60 chemical composition of the brucite type layer: (a) variation of  $a$  parameter, (b) variation of  $c$  parameter. The reference samples for the  $\text{Mg}_x\text{Al-CO}_{32}$  ( $x=3$  and  $2.5$ , labeled HT3-CO<sub>3</sub> and HT2.5, respectively) were extracted from our previous works [33, 34, 56].

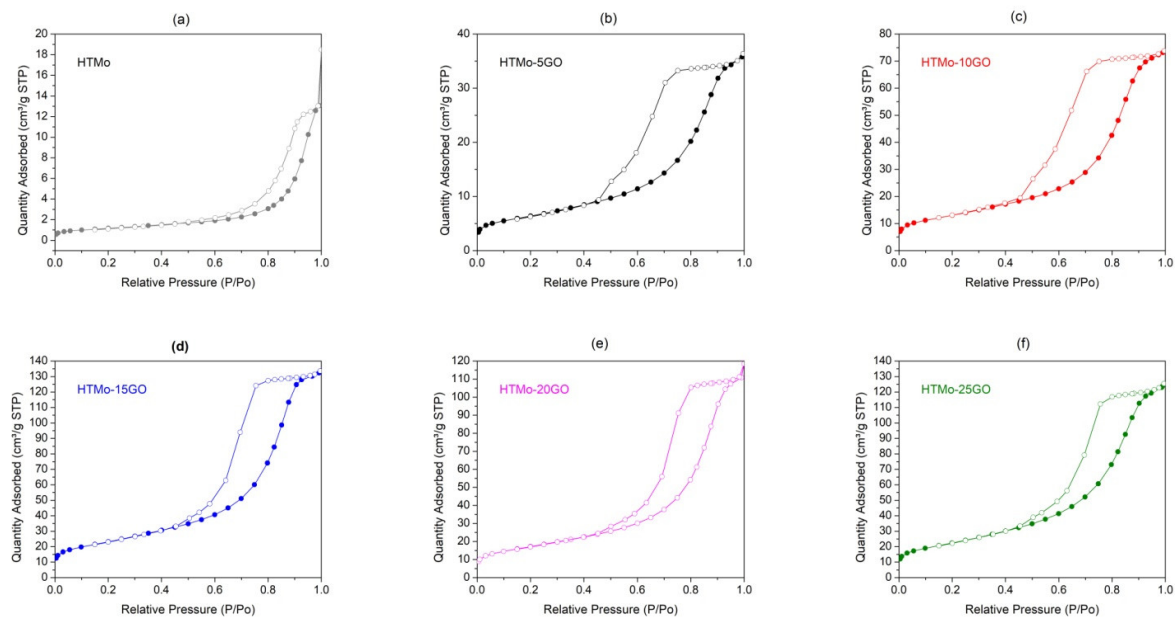

Figure S2. BET isotherms of the investigated samples.

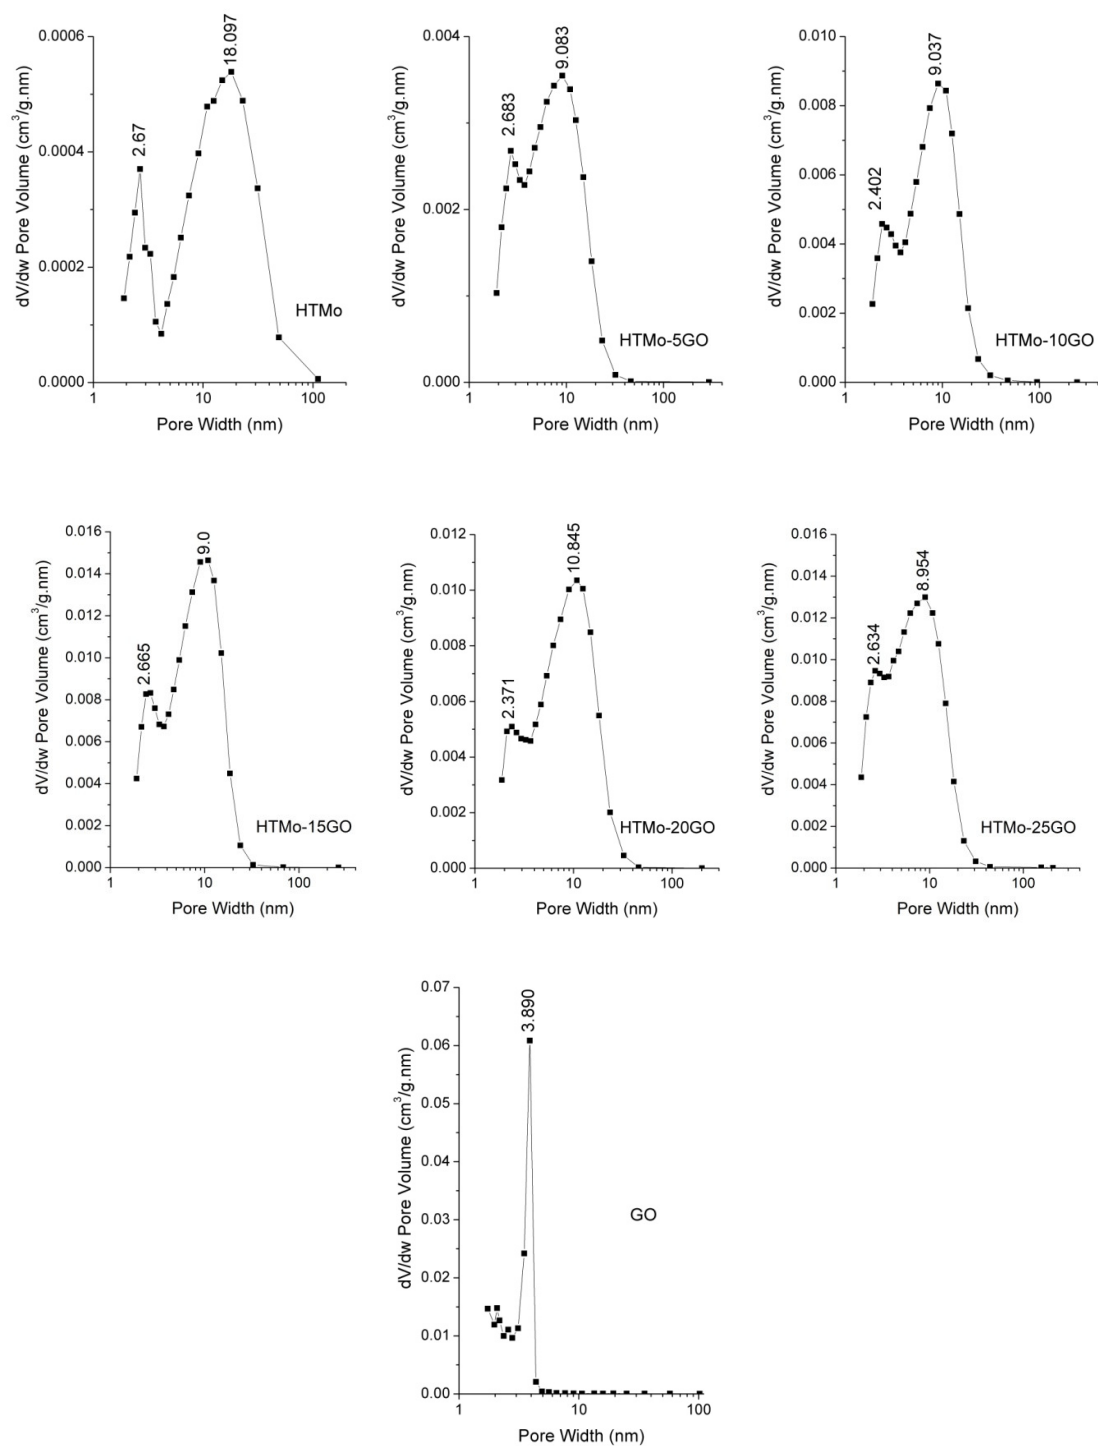

Figure S3. Pore size distribution of the investigated samples (BJH, Halsey-Faas correction).

**Table S2.** The chemical oxygen demand (COD) and total organic carbon content (TOC) of the water samples after the catalytic tests performed with concentrated solution of IC ( $IC_0=90 \times 10^{-3} M$ ; COD initial 574.7 mg  $O_2/L$ ; TOC initial -174.2 mg C/L) at a molar ratio  $H_2O_2/IC=48/1$ .

| Catalysts | IC conversion (%) | COD | TOC    |
|-----------|-------------------|-----|--------|
| HTMo      | 68.7              | 180 | 55     |
| HTMo-5GO  | 81.2              | 108 | u.d.l. |
| HTMo-10GO | 84.7              | 88  | u.d.l. |
| HTMo-15GO | 85.4              | 84  | u.d.l. |
| HTMo-20GO | 95.4              | 27  | u.d.l. |
| HTMo-25GO | 88.3              | 67  | u.d.l. |

u.d.l. = under detection limit

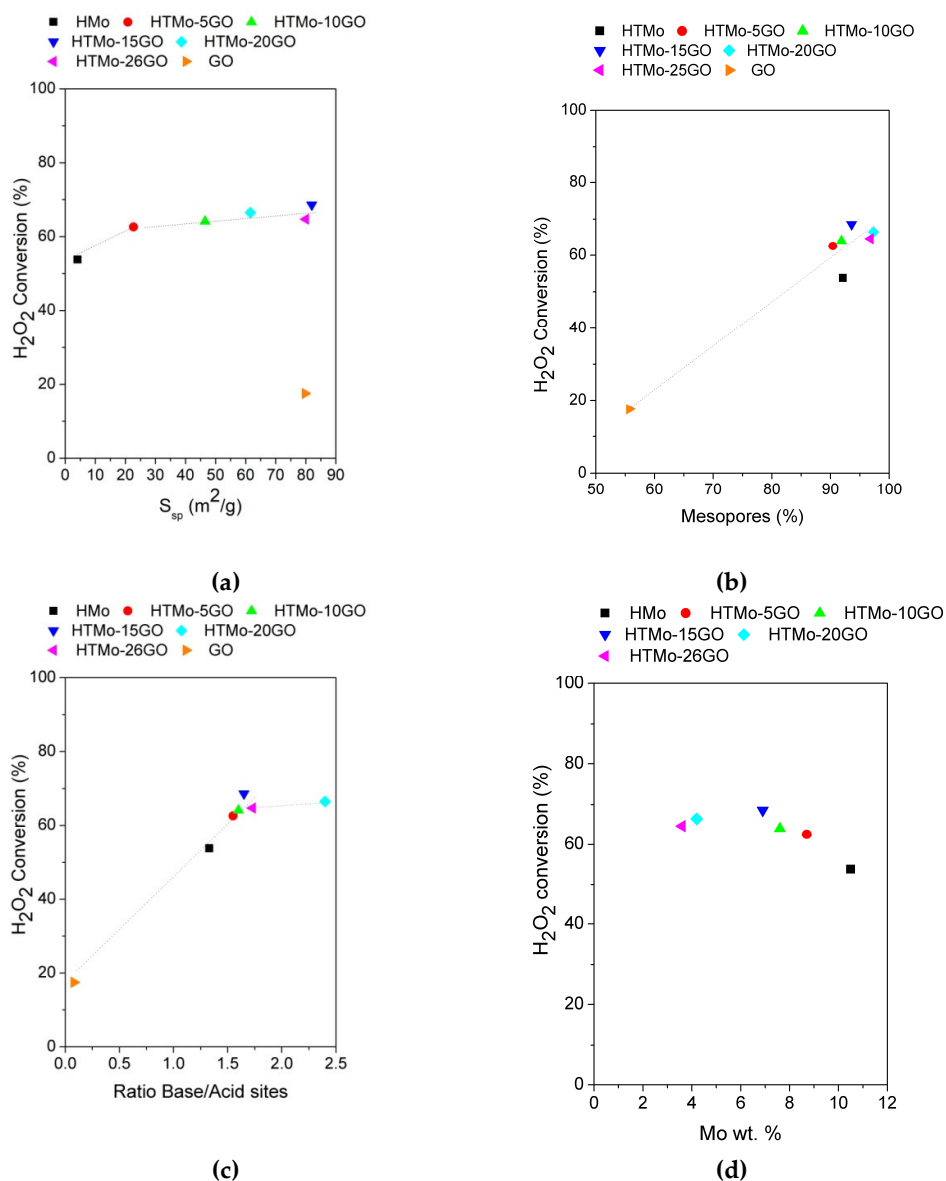

**Figure S4.** The influence of the physico-chemical characteristics of the investigated catalysts on  $H_2O_2$  conversion: (a) specific surface areas; (b) the proportion of mesopores; (c) the basicity expressed as the ratio between base and acid sites; (d) Mo concentration; (Reaction conditions:  $IC_0=30 \times 10^{-3}$  M,  $H_2O_2/IC=48$  catalysts concentration 1 wt. %, 150 rpm, 2 h, 25 °C).

## References

- Hummers, W.S.; Offeman, R.E. Preparation of graphitic oxide. *J. Am. Chem. Soc.*, **1958**, *80*, 1339–1339. <https://doi.org/10.1021/ja01539a017>
- Stamate, A.-E.; Pavel, O.D.; Zăvoianu, R.; Brezeștean, I.; Ciorîță, A.; Bîrjega, R.; Neubauer, K.; Koeckritz A.; Marcu, I.-C. Ce-containing MgAl-layered double hydroxide-graphene oxide hybrid materials as multifunctional catalysts for organic transformations. *Materials* **2021**, *14*, 7457. <https://doi.org/10.3390/ma14237457>

- 
33. Zăvoianu, R.; Bîrjega, R.; Pavel, O.D.; Cruceanu, A.; Alifanti, M. Hydrotalcite like compounds with low Mo-loading active catalysts for selective oxidation of cyclohexene with hydrogen peroxide. *Appl. Catal. A: General* **2005**, *286*, 211–220. <https://doi.org/10.1016/j.apcata.2005.03.009>
34. Zăvoianu, R.; Cruceanu, A.; Pavel, O.D.; Angelescu, E.; Soares Dias, A.P.; Bîrjega, R. Oxidation of tert-butanethiol with air using Mo containing hydrotalcite-like compounds and their derived mixed oxides as catalysts. *React. Kinet. Mech. Catal.* **2012**, *105*, 145–162. <https://doi.org/10.1007/s11144-011-0398-9>
56. Zăvoianu, R.; Pavel, O. D.; Cruceanu, A.; Florea, M.; Bîrjega, R. Functional layered double hydroxides and their catalytic activity for 1,4-addition of n-octanol to 2-propenenitrile. *Appl. Clay. Sci.* **2017**, *146*, 411–422. <https://doi.org/10.1016/j.clay.2017.06.030>
